# Supplementary material
Source: PubMed Central journal article supplement (PMC7237181)
Supplement: mmc1.pdf [file mmc1.pdf]

# THE LANCET Infectious Diseases

## Supplementary webappendix

This webappendix formed part of the original submission and has been peer reviewed. We post it as supplied by the authors.

Supplement to: Durrheim DN, Gostin LO, Moodley K. When does a major outbreak become a Public Health Emergency of International Concern? *Lancet Infect Dis* 2020; published online May 19. [https://doi.org/10.1016/S1473-3099\(20\)30401-1](https://doi.org/10.1016/S1473-3099(20)30401-1).



|                                                                                                         |                                                                                                                                                                                                                                                                                                                                                                                                                                                                                                                                                                                                                                                     |                  |
|---------------------------------------------------------------------------------------------------------|-----------------------------------------------------------------------------------------------------------------------------------------------------------------------------------------------------------------------------------------------------------------------------------------------------------------------------------------------------------------------------------------------------------------------------------------------------------------------------------------------------------------------------------------------------------------------------------------------------------------------------------------------------|------------------|
| Is there significant risk of international spread?                                                      | <ul style="list-style-type: none"> <li>○ There is evidence of an epidemiological link to similar events in other countries/territories</li> <li>○ There is an imminent risk of global spread (excluding medevac or other similar situations)</li> <li>○ There are factors that should alert us to the potential for imminent cross border regional movement of the agent, vehicle or host</li> </ul>                                                                                                                                                                                                                                                | 7<br>7<br>7      |
| Is there a need for a coordinated international response?                                               | <ul style="list-style-type: none"> <li>○ A functional national response is lacking (national leadership, other IHR relevant core capacities)</li> <li>○ Functional regional cross-border coordination is lacking</li> <li>○ A functional global response is lacking</li> <li>○ Information/data is not being shared in a timely manner and/or impeding the WHO's capacity to evaluate the risk</li> </ul>                                                                                                                                                                                                                                           | 5<br>5<br>5<br>5 |
| Have similar events in the past posed a significant risk to international travel or trade restrictions? | <ul style="list-style-type: none"> <li>○ Similar events in the past have resulted in international restrictions on trade and/or travel</li> <li>○ The source is suspected or known to be a food product, water or any other goods that might be contaminated, that has been exported/imported from other countries (taking into account existent practice with FAO and OIE)</li> <li>○ The event occurs in association with an international mass gathering or in an area of intense international tourism</li> <li>○ The event causes significantly increased requests for more information by foreign officials or international media</li> </ul> | 5<br>5<br>5<br>5 |
